# Supplementary material for: Development of a CO2-biomethanation reactor for producing methane from green H2
Source: Royal Society of Chemistry journal article supplement (doi:10.1039/d3se01550e), 2024-01-01
Supplement: d3se01550e1.pdf [file d3se01550e1.pdf]

**Supplementary information for**

**Development of a CO<sub>2</sub>-biomethanation reactor for producing methane from green H<sub>2</sub>**

Grégory Cwicklinski<sup>1\*</sup>, Roger Miras<sup>1</sup>, Julien Pérard<sup>1</sup>, Clara Rinaldi<sup>1</sup>, Elisabeth Darrouzet<sup>1</sup>,  
Christine Cavazza<sup>1\*</sup>

1: *Univ. Grenoble Alpes, CEA, CNRS, IRIG, CBM. F-38000 Grenoble (France)*

\* Corresponding authors

*Table S1 : Details of the bioreactor equipment*

| <b>Mark</b> | <b>Apparatus</b>                                                                                                                                | <b>Features / Function</b>                                                                                                                                                       |
|-------------|-------------------------------------------------------------------------------------------------------------------------------------------------|----------------------------------------------------------------------------------------------------------------------------------------------------------------------------------|
| 1, 8        | <b>Top and bottom perforated flanges</b><br>Béné inox<br>Ref : 357182-65                                                                        | 304L / 1.4307; DN65 / 2 <sup>1/2</sup> ”; thickness 18 mm<br>Perforated flange for fluid circulation and bioreactor instrumentation                                              |
| 2           | <b>ISO tube for double jacket</b><br>Béné inox<br>Ref : 372212-762                                                                              | 304L / 1.4307; DN65 / 2 <sup>1/2</sup> ”; thickness 2 mm<br>Double jacket for temperature control                                                                                |
| 3           | <b>ISO tube for bubble column</b><br>Béné inox<br>Ref : 372212-1142                                                                             | 304L / 1.4307; DN100 / 4”; thickness 2 mm<br>Bubble column for the methanation reaction                                                                                          |
| 4           | <b>Borosilicate-viewing window</b><br>Béné inox<br>Ref: 261421-76                                                                               | 304L ; DN76 / 3” ; PF = 10 bar. TF = 130°C<br>Part of the bioreactor allowing visualization of the culture medium and correct operation of the gas bubbling system.              |
| 5           | <b>Welded boss for instrumentation</b><br>Béné inox<br>Ref : 652344-10<br><br>Sealed passage<br>Ham-let<br>Ref: 768LGSS12MMX3/8 &<br>760LST12MM | 316L ; 3/8” ; Internal diameter 12.6 mm<br>Connection for probe instrumentation up to 12 mm in diameter (e.g. pH probe). Used with "double ring" type fittings and Teflon rings. |
| 6           | <b>Porous metal filter</b><br>Poral<br>Grade 3                                                                                                  | 304L SS; diameter 50 mm; mean pore size 10 µm<br>Promotion of bubbly flow at the reactor inlet (gas supply)                                                                      |
| 7           | <b>Porous metal filter</b><br>Stem<br>Ref. SPR1/8I                                                                                              | 316L SS; cylinder with surface 6 cm <sup>2</sup> ; mean pore size 80 µm<br>Promotion of bubbly flow at the reactor inlet (gas recirculation)                                     |

Figure S1 : CAD view of bioreactor with dimensions. Left: front cross-section; right: top view

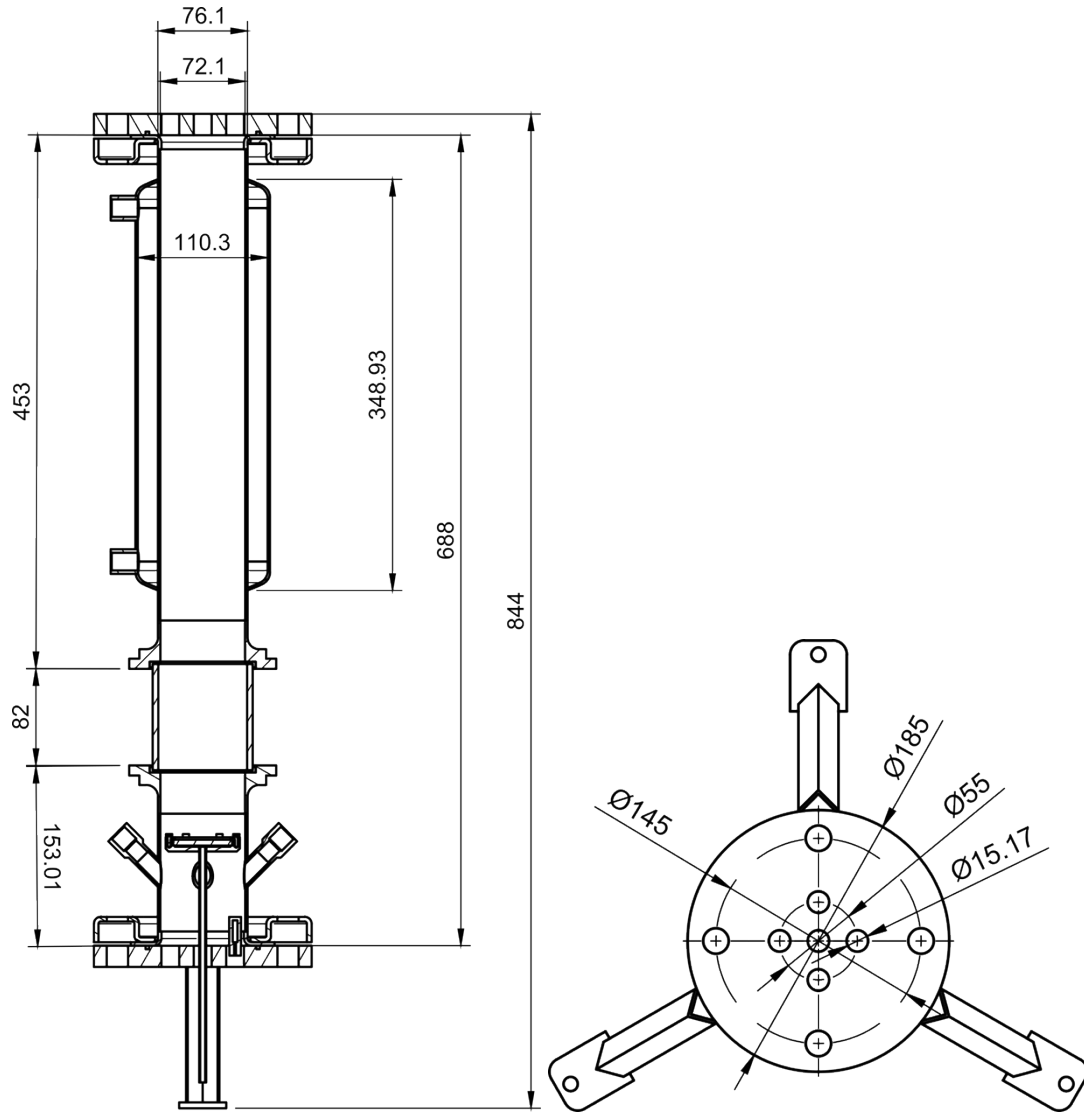

Table S2. Correlations, expressions and experimentally determined values used in the ADR model of the bubble column bioreactor

| Dimension                         | Correlation / Expression / experimental value                                                                                                                                                                                                   | Reference                            |
|-----------------------------------|-------------------------------------------------------------------------------------------------------------------------------------------------------------------------------------------------------------------------------------------------|--------------------------------------|
| Mass transfer                     | $\phi_i = k_{L,i} a \cdot (H_i^{cc} \cdot C_{G,i} - C_{L,i})$                                                                                                                                                                                   | 1                                    |
| Coefficient de transfert de masse | $k_{l,i}^{d_b < 0.0025} = 0,31 \cdot \rho_l^{(2/3)} \cdot \left( \frac{g \cdot \rho_l}{\mu_l} \right)^{(1/3)}$ $k_{l,i}^{d_b > 0.0025} = 0,42 \cdot \rho_l^{(1/2)} \cdot \left( \frac{(g \cdot \rho_l)^{(1/2)}}{\mu_l^{(1/2)}} \right)^{(1/3)}$ | 2                                    |
| Volume interfacial area           | $a = \frac{6 \cdot \varepsilon_G}{d_b}$                                                                                                                                                                                                         | 3                                    |
| Holdup                            | $\varepsilon_g = \frac{U_g}{u_b}$                                                                                                                                                                                                               | 4                                    |
| Bubble rise velocity              | $u_b = \frac{g \cdot \rho_l}{18 \mu_l} d_b^2$                                                                                                                                                                                                   | 4                                    |
| Superficial velocity              | $U_G = \frac{Q_g}{S_{reac}} = \frac{Q_{n,g}}{S_{reac}} \cdot \frac{P_n}{P_{reac}} \cdot \frac{T_{reac}}{T_n}$                                                                                                                                   |                                      |
| Bubble size                       | $d_b = 0.17 \text{ mm}$                                                                                                                                                                                                                         | Experimentally measured in this work |
| Axial dispersion coefficient      | $D_{ax} = K_r D_{reac}^{4/3} (U_g g)^{1/3}$ and $K_r = 0.35$                                                                                                                                                                                    | 5                                    |

Table S3: Details of experimental set-up equipment

| Mark | Apparatus                                                                | Features / Function                                                                                                                                                                                                                     |
|------|--------------------------------------------------------------------------|-----------------------------------------------------------------------------------------------------------------------------------------------------------------------------------------------------------------------------------------|
| A    | <b>Manual pressure regulator Air Liquide</b><br>Ref: BS 50-10-3.5        | Maximum pressure reduction: 10 bar (relative)<br>Maximum flow rate: $Q = 3.5 \text{ Nm}^3 \text{ h}^{-1}$ (from supplier $\text{N}_2$ calibration)<br>Adjustment of the inlet pressure ( $\text{H}_2 + \text{CO}_2$ ).                  |
| B    | <b>Flow regulator Bronkhorst</b><br>Ref. F-201CV                         | Calibrated for $\text{H}_2\text{-CO}_2$ mixture in the range : $0.4 \text{ L h}^{-1} < Q < 2 \text{ L h}^{-1}$<br>Measurement and regulation of the reactor feed rate                                                                   |
| C    | <b>Porous metal filter Poral</b><br>Grade 3                              | 304L SS; diameter 50 mm; mean pore size $10 \mu\text{m}$<br>Promotion of bubbly flow at the reactor inlet (gas supply)                                                                                                                  |
| D    | <b>Porous metal filter Stem</b><br>Ref. SPR1/8I                          | 316L SS; cylinder with surface $6 \text{ cm}^2$ ; mean pore size $80 \mu\text{m}$<br>Promotion of bubbly flow at the reactor inlet (gas recirculation)                                                                                  |
| E    | <b>Pump Schwarzer Precision</b><br>Ref : SP 622 EC-BL-DU-HR-DV (24 V DC) | Positive displacement diaphragm pump<br>Range: $3.39 \text{ L h}^{-1} < Q < 11.13 \text{ L h}^{-1}$ at $24^\circ\text{C}$ and 1.14 bar<br>Adjustment and measurement of the recirculation flow-rate (from top to bottom of the reactor) |
| F    | <b>Hydraulic guard</b>                                                   | $V = 12 \text{ mL}$<br>Protection of the reactor against possible oxygen contamination                                                                                                                                                  |
| G    | <b>Centrifugal Pump</b><br>Ref : TD40G-1260B                             | Voltage: 12V DC, Maximum liquid flow: $650 \text{ L h}^{-1}$ , Power consumption: 1,6 A<br>Circulation of the heat transfer fluid (DI water) in the reactor's double-jacket                                                             |
| H    | <b>Flow regulator Bronkhorst</b><br>Ref. F-211CV                         | Calibrated for $\text{H}_2\text{-CO}_2$ mixture in the range $0.4 \text{ L h}^{-1} < Q < 5 \text{ L h}^{-1}$<br>Measurement and regulation of the reactor output flow                                                                   |
| I    | <b>Peltier thermal control unit</b><br>(See Table S)                     | Cooling or heating for thermal regulation of the culture medium                                                                                                                                                                         |
| J    | <b>Bubble column bioreactor with double jacket thermal control</b>       | $V = 2.8 \text{ L}$ , with double jacket ( $V = 1.7 \text{ L}$ , exchange surface $833 \text{ cm}^2$ ).<br>Methanogen culture chamber for methanation reaction equipped with temperature control and gas dispersion system.             |
| K    | <b>Gas-liquid separator</b>                                              | $V = 108 \text{ mL}$ .<br>Separation of the liquid dragged in the upper part of the reactor (due to the possible creation of foam)                                                                                                      |
| L    | <b>Condenser</b>                                                         | $V = 143 \text{ mL}$ , exchange surface $132 \text{ cm}^2$<br>Water condensation of the outlet gas stream                                                                                                                               |
| M    | <b>Safety valve Ham'let</b><br>Ref. H-900-SS-L-6MM-SL-CE                 | Adjustable<br>Protection of the reactor in the event of overpressure                                                                                                                                                                    |
| N    | <b>Adjustable check valve Ham'let</b><br>Ref. H-400A-SS-L-6MM-50         | Pressure adjustment of the reactor.                                                                                                                                                                                                     |
| O    | <b>Desiccator (alumina)</b>                                              | $V = 45 \text{ mL}$<br>Elimination of traces of water in the outlet gas before measuring the composition and the flow rate.                                                                                                             |

Table S4: Details of the experimental set-up on-line instrumentation.

| Mark      | Apparatus                                                                                         | Features / Function                                                                                                                                                                                                 |
|-----------|---------------------------------------------------------------------------------------------------|---------------------------------------------------------------------------------------------------------------------------------------------------------------------------------------------------------------------|
| 1         | <b>Thermal mass flowmeter<br/>Bronkhorst<br/>Ref. F-201CV</b>                                     | See B in<br><br>Table S3<br>Measurement of gas supply flow (unit of use L h <sup>-1</sup> )<br>Measurement uncertainty: ± 0.5 % (± 0.1 % of the full scale)                                                         |
| 2         | <b>Pressure sensor<br/>Keller<br/>Ref. PAA25</b>                                                  | Range 0 bar < P << 5 bars<br>Measurement of the pressure of the feed gas<br>Measurement uncertainty: ± 1.27 %                                                                                                       |
| 3,5,<br>6 | <b>Temperature, pH and redox potential<br/>probe<br/>Mettler-Toledo<br/>Ref. NPRO3253i/SG/120</b> | Ranges 0 °C < T < 100°C ; 0 < pH < 12 ; -513 mV < ORP < 513 mV<br>Measurement of the culture medium temperature (T), pH and redox potential (ORP)<br>Measurement uncertainty: T ± 1.00°C ; pH ± 4.75 % ; ORP ± 5 mV |
| 4         | <b>Turbidity sensor<br/>DFRobot<br/>SEN0189</b>                                                   | Range 0 < OD <sub>600</sub> < 2.5 (absorbance at 600 nm)<br>Measurement of the culture medium turbidity representative of the cell concentration)<br>Measurement uncertainty: ± 1.98 %                              |
| 7         | <b>Pressure sensor<br/>Keller<br/>Ref. PAA25</b>                                                  | Range 0 bar < P < 5 bars<br>Measurement of the reactor's pressure<br>Measurement uncertainty: ± 2.03 %                                                                                                              |
| 8         | <b>Thermal mass flowmeter<br/>Bronkhorst<br/>Ref. F-211CV</b>                                     | See H in<br><br>Table S3<br>Measurement of outlet gas flow (unit of use L h <sup>-1</sup> )<br>Measurement uncertainty: ± 0.5 % (± 0.1 % of the full scale)                                                         |
| 9         | <b>Pressure sensor<br/>Wika<br/>Ref. A-10</b>                                                     | Range 0 < P < 3.2 bars<br>Measurement of the pressure of the outlet gas<br>Measurement uncertainty: ± 0.95 %                                                                                                        |
| 10        | <b>Themocouple type K<br/>RS 397-1264</b>                                                         | Range -40 °C < T < 1100 °C<br>Measurement of the temperature of the outlet gas<br>Measurement uncertainty: ± 1.5 °C                                                                                                 |
| 11        | <b>NDIR gas sensor<br/>smartGAS<br/>Ref. F3-212507-05000</b>                                      | Calibration range 0 < X <sub>CO2</sub> < 50%<br>Measurement of the CO <sub>2</sub> content in the outlet gas<br>Measurement uncertainty: ± 1.24 %                                                                   |
| 12        | <b>NDIR gas sensor<br/>smartGAS<br/>Ref. 042108-05000</b>                                         | Calibration range 0 < X <sub>CH4</sub> < 100%<br>Measurement of the CH <sub>4</sub> content in the outlet gas<br>Measurement uncertainty: ± 1.69 %                                                                  |
| 13        | <b>Pump<br/>Schwarzer Precision<br/>Ref : SP 622 EC-BL-DU-HR-DV (24 V DC)</b>                     | See E in Table S3<br>Measurement of the recirculation flow-rate                                                                                                                                                     |

## **Control module**

A control module dedicated to temperature control and optical density measurement has been developed specifically for the needs of the experimental bench. The module is entirely based on Arduino® microcontrollers type Mega 2560 Rev3.

The microcontroller is used to regulate the temperature of a heat transfer fluid (water) using a heat exchange system (2). The system consists of a flat heat exchanger (3), Peltier thermoelectric modules (4) with a total output of 120 W, passive heat sinks (2) and fans (1). Temperature control is achieved by alternating the Seebeck and Peltier effects by reversing the thermoelement power supply. The temperature of the heat transfer fluid is controlled by a PT100 sensor and circulated by a centrifugal micropump. The components used are listed in table S5.

The microcontroller is also used to measure the concentration of microorganisms by measuring the turbidity of the medium (Figure S2). The system consists of a turbidity measurement cell (E) integrated in a culture medium recirculation loop using a volumetric pump (8). To obtain the concentration value in OD units, a calibration between the turbidity measurement and the absorbance measurement at 600 nm was carried out in the laboratory (Figure S3). The components used in the fabrication of the turbidity measurement module are listed in table S5.

Figure S2: Diagram of control module for temperature regulation and OD determination

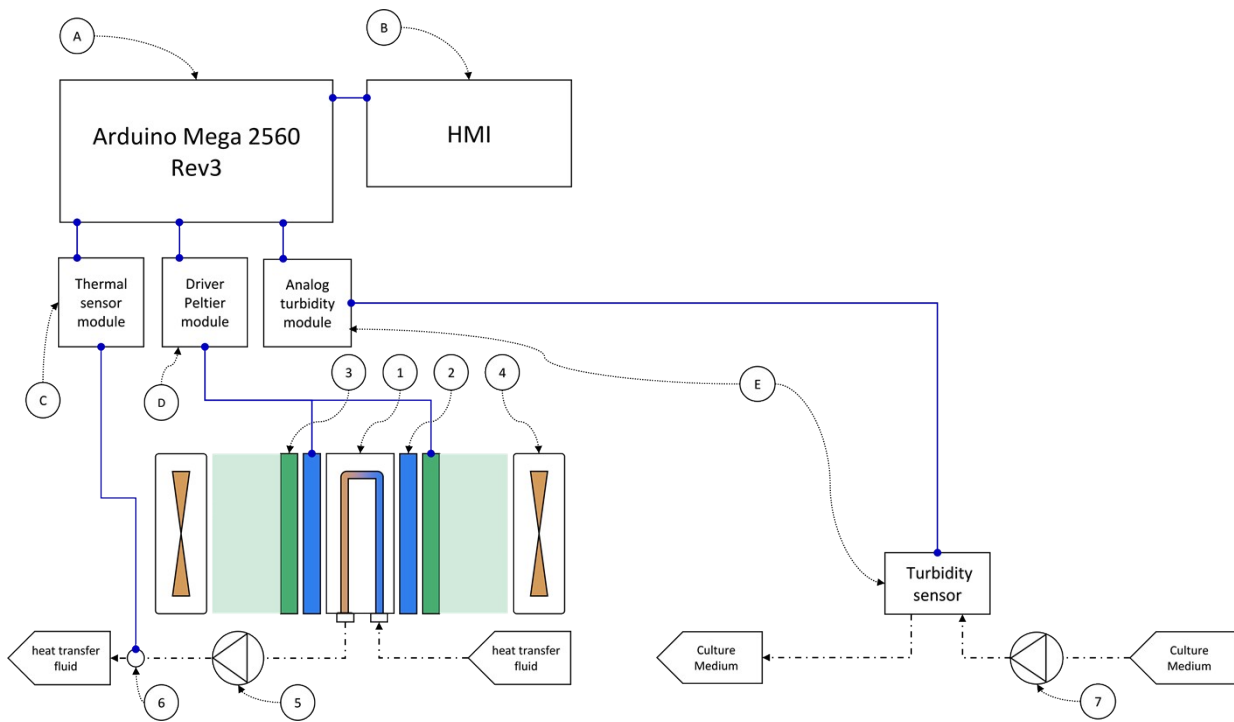



Figure S3: Correlation of optical density measurement at 600 nm in *Escherichia coli* by turbidity measurement using a DFRobot SEN0189 turbidimeter

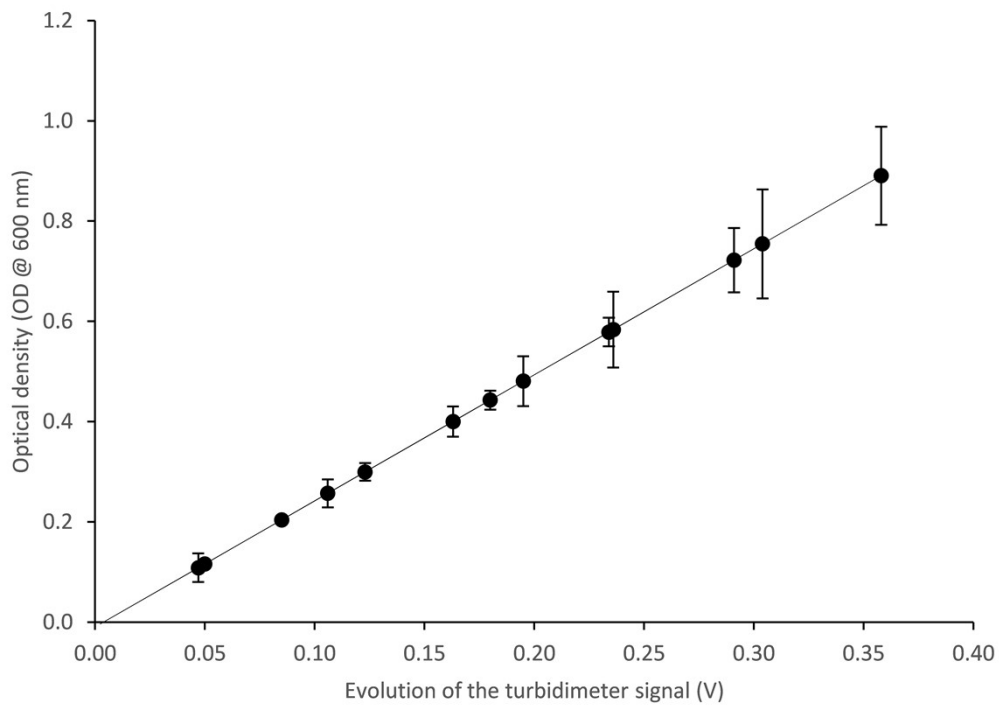

Table S5 Thermal and turbidity control module details

| Mark | Apparatus                                                                 | Features / Function                                                                                                          |
|------|---------------------------------------------------------------------------|------------------------------------------------------------------------------------------------------------------------------|
| A    | Microcontroller<br>Arduino<br>Ref : Mega 2560 Rev3                        | Voltage : 12 VDC                                                                                                             |
| B    | HMI<br>Nextion<br>Ref : NX4827T043                                        | Voltage : 5 VDC ; Screen 4.3"                                                                                                |
| C    | Thermal sensor module<br>DFROBOT<br>Ref: SEN0198                          | Functional detection range: 30 °C -350 °C<br>Relative error: ±2%                                                             |
| D    | Cytron<br>Ref: Shield MD10                                                | Voltage ranges: 7 – 30V<br>Maximum current: 10 A                                                                             |
| E    | Analog turbidity sensor<br>DFROBOT<br>Ref: SEN0189                        | Operating Temperature: 5 °C – 90 °C<br>Relative error: ±8% measured values                                                   |
| 1    | Heat exchanger<br>Laird Technologies<br>Ref: LI201                        | Material: Copper<br>Size: 12.7 x 57 x 51mm                                                                                   |
| 2    | Peltier module<br>Adaptive<br>ET-199-14-15-E                              | Active Size: 40 x 40 mm<br>Maximum cooling capacity: 94.3W<br>Maximum temperature difference : +74K                          |
| 3, 4 | Fans and Passive heat sinks<br>Xilence<br>Ref: I200                       | Material: Aluminium<br>Size: 95 x 95 x 70 mm<br>Flow : 40.9 CFM<br>Voltage alimentation : 12 VDC                             |
| 5    | Thermal water pump<br>Ref: TD40G-1260B                                    | Type: Centrifugal<br>Voltage: 12V DC<br>Maximum liquid flow: 650 L h <sup>-1</sup>                                           |
| 6    | Temperature sensor<br>Jumo<br>Ref: 902250/32-415-1001-1-3-200-04-2500/000 | PT100 ; Ø 3 mm, length: 200 mm<br>3 wire ; classe B                                                                          |
| 7    | Culture medium circulation pump<br>RS Pro<br>Ref : D250-03                | Type: Diaphragm<br>Flow Rate : 380 mL min <sup>-1</sup> ; DP: 0.7 bars<br>Voltage : 1.5 – 5 VDC<br>Power consumption: 0.48 W |

Figure S4: Evolution of the growth of *M. maripaludis* in solution (A) and of the volume fraction of CH<sub>4</sub> in the tube gas phase (B-C) in the two tested growth media.

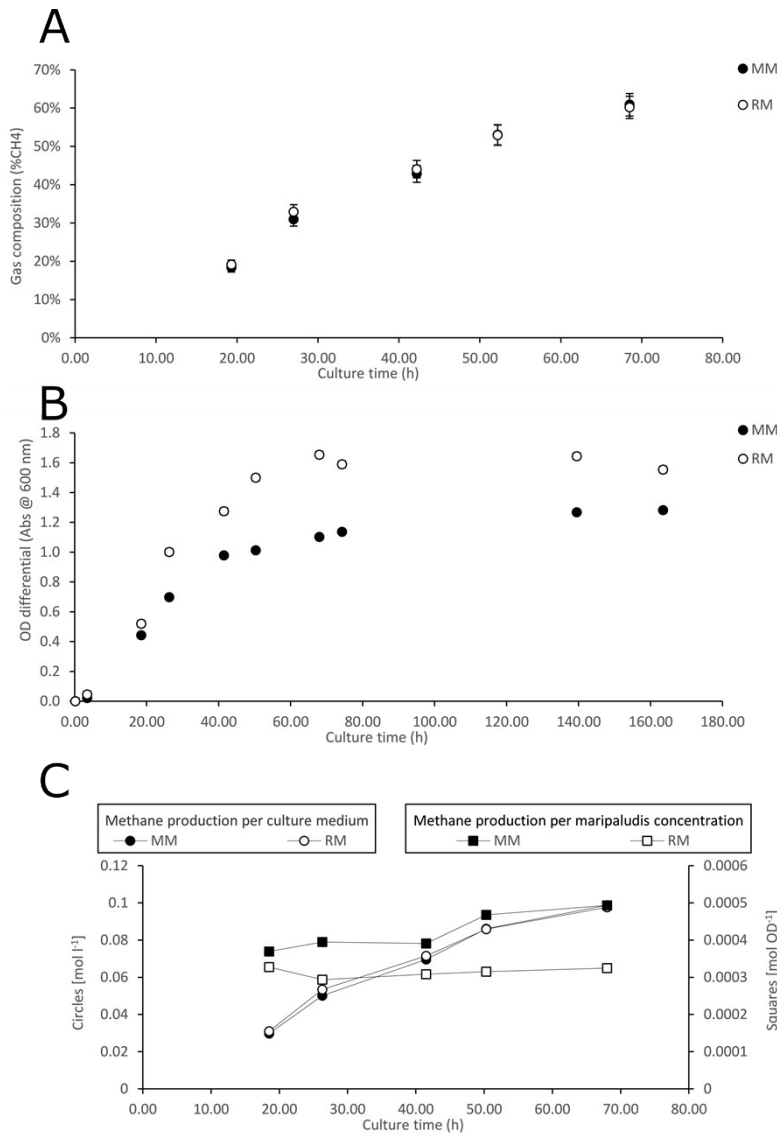

### ***Gas chromatography***

Gas chromatography (GC) measurements were used to determine the composition of the gaseous headspace in the cultures. They were carried out using a Perkin Elmer's Clarus 580 GC with a Porapak Q, 80/100, SS, 6' x 1/8" x 6" GC column, with N<sub>2</sub> as the carrier gas. FID Detector was used to analyse CH<sub>4</sub>, CO<sub>2</sub> and CO. TCD Detector was used to analyse H<sub>2</sub> and O<sub>2</sub>. 50 µL of overhead gas were injected into the GC using a gas-tight glass Hamilton syringe. The quantity of gas injected is normalized with temperature and pressure, and compared with an extemporaneously produced calibration curve.

Figure S5: Monitoring of the temperature of the culture of *M. maripaludis* in the bioreactor

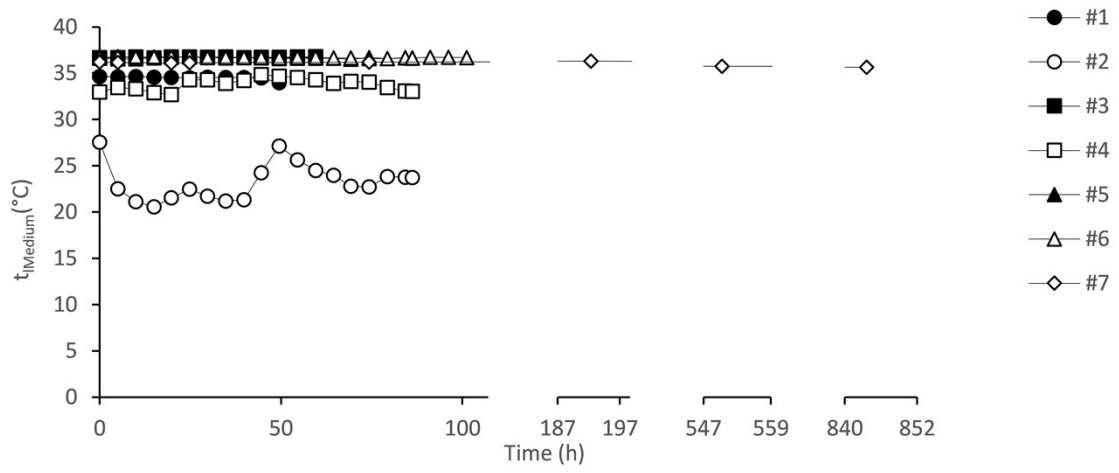

Figure S6: Monitoring of the  $OD_{600\text{ nm}}$  of the culture of *M. maripaludis* in the bioreactor

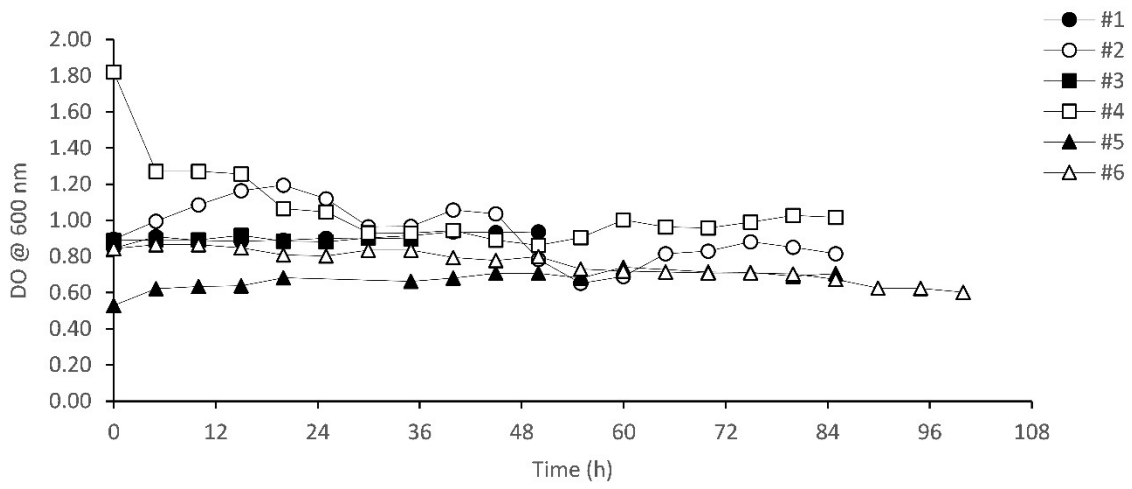

Figure S7: Monitoring of the redox potential of the culture of *M. maripaludis* in the bioreactor.

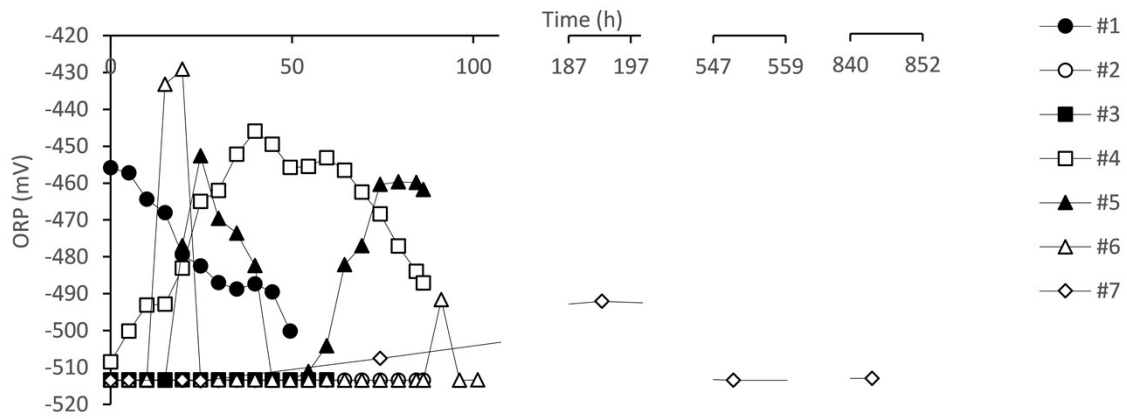

Figure S8: Monitoring of the pH of the culture of *M. maripaludis* in the bioreactor

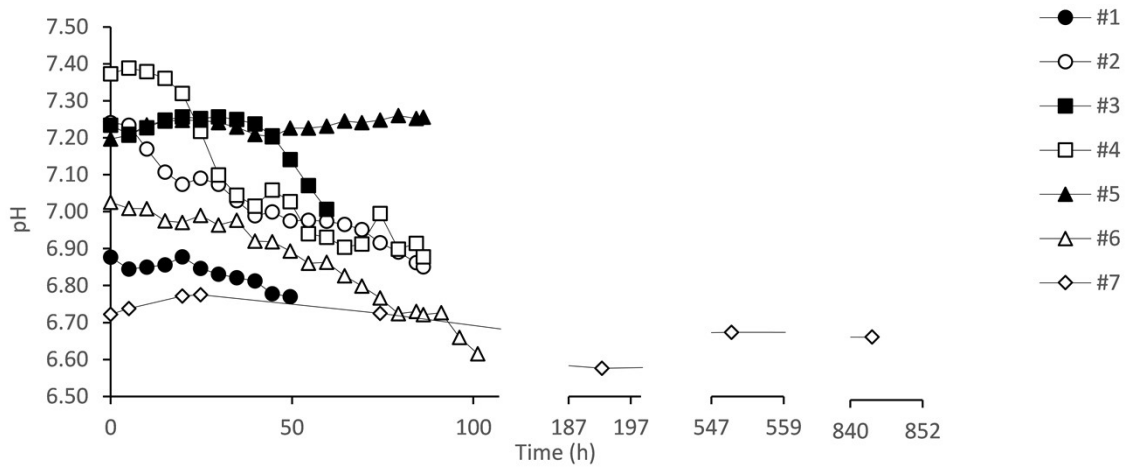



Figure S9: Pressure maintained in bioreactor

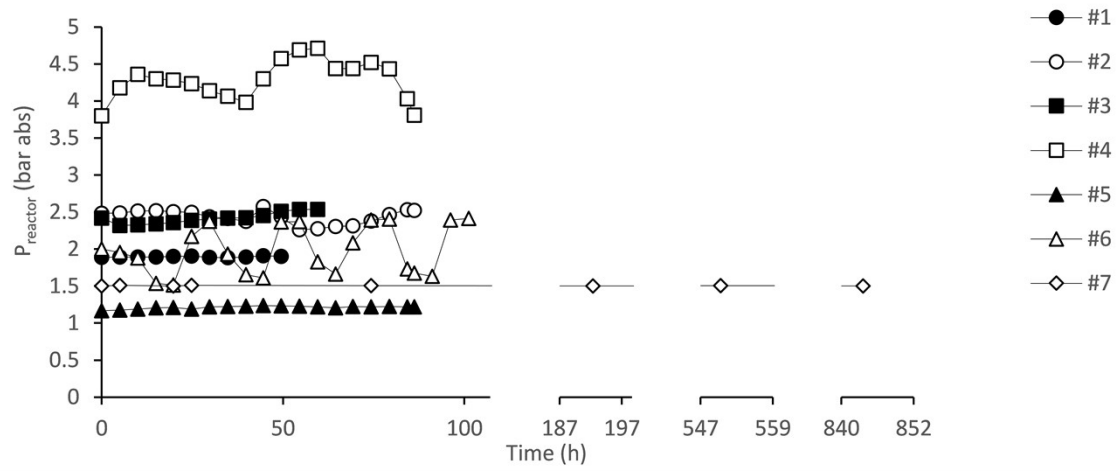

Figure S10: Hydrogen inlet flow rate in the bioreactor

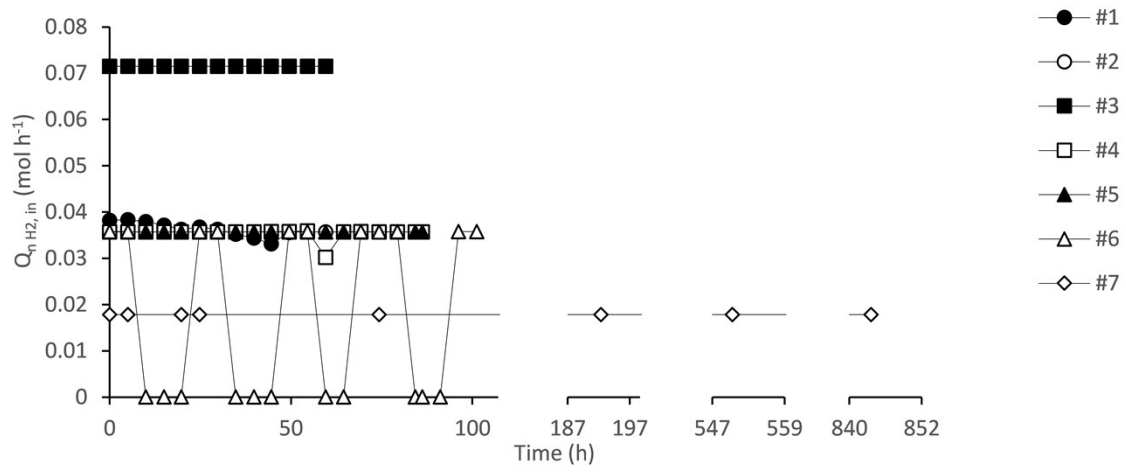

Figure S11: Methane outlet flow rate

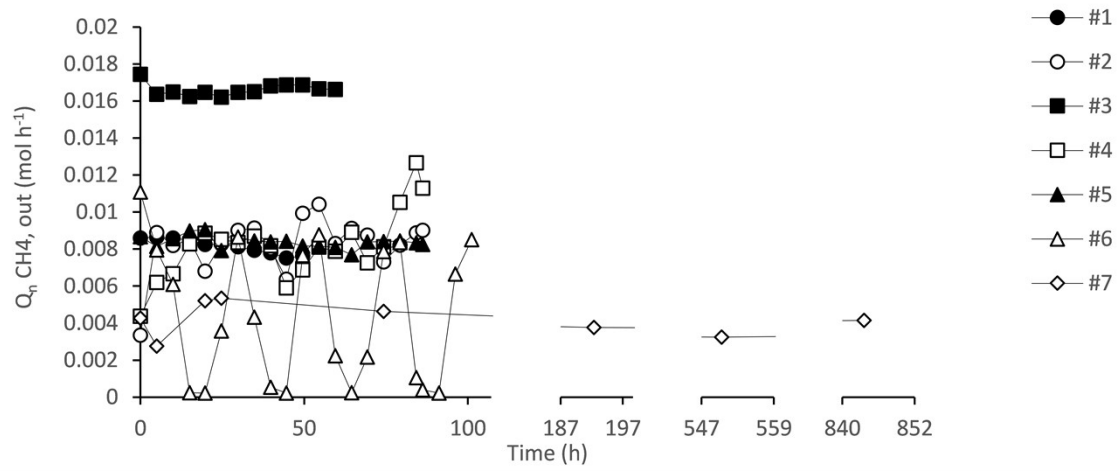

### List of Latin notations

|                 |                                                                                                               |                       |
|-----------------|---------------------------------------------------------------------------------------------------------------|-----------------------|
| $a$             | interfacial area                                                                                              | $[m^2 m^{-3}]$        |
| $C_{\varphi,i}$ | Molar concentration of « i » in the « $\varphi$ » phase                                                       | $[mol m^{-3}]$        |
| $d_b$           | Diameter of gas bubbles in the column                                                                         | $[m]$                 |
| $D$             | Diameter                                                                                                      | $[m]$                 |
| $D_{ax}$        | Axial dispersion                                                                                              | $[m^2 s^{-1}]$        |
| $\varepsilon$   | Gas hold-up                                                                                                   | $[-]$                 |
| $g$             | Acceleration of gravity at the Earth's surface                                                                | $[m s^{-2}]$          |
| $H^{cc}$        | Henry's law coefficient expressed as a ratio of the concentrations of « i » between the liquid and gas phases | $[-]$                 |
| $k_{\varphi,i}$ | Transfer coefficient of « i » in the « $\varphi$ » phase                                                      | $[m s^{-1}]$          |
| $MER$           | Molar production of methane per reactor volume                                                                | $[mol m^{-3} s^{-1}]$ |
| $MP$            | Methane Production                                                                                            | $[mol m^{-3} m^{-3}]$ |
| $PVR$           | Power density per unit reactor volume                                                                         | $[Wh m^{-3}]$         |
| $P$             | Pressure                                                                                                      | $[Pa]$                |
| $Qv$            | Volume flow                                                                                                   | $[m^3 s^{-1}]$        |
| $Qn$            | Molar flow                                                                                                    | $[mol s^{-1}]$        |
| $r_{app}$       | Apparent reaction rate                                                                                        | $[s^{-1}]$            |
| $S$             | Surface                                                                                                       | $[m^2]$               |
| $T$             | Temperature                                                                                                   | $[K]$                 |
| $t$             | Time                                                                                                          | $[s]$                 |
| $U_g$           | Surface velocity of gas in the column                                                                         | $[m s^{-1}]$          |
| $u_b$           | Rising speed of gas bubbles                                                                                   | $[m s^{-1}]$          |
| $\chi$          | Stoichiometric conversion yield                                                                               | $[-]$                 |
| $Y_{CH_4}$      | Methane conversion yield                                                                                      | $[-]$                 |
| $y_i$           | Gas volume fraction of compound « i »                                                                         | $[-]$                 |

### List of Greek notations

|          |                                                     |                       |
|----------|-----------------------------------------------------|-----------------------|
| $\phi_i$ | Volumetric molar flow of material « i » transferred | $[mol m^{-3} s^{-1}]$ |
| $\eta_i$ | Stoichiometric coefficient of the compound « i »    | $[-]$                 |
| $\rho$   | Density                                             | $[kg m^{-3}]$         |

### List of subscript

|           |                                      |
|-----------|--------------------------------------|
| $ax$      | Axial direction of flow              |
| $app$     | Relative to an apparent value        |
| $g$       | Relating to gas                      |
| $i$       | Relative to the indefinite component |
| $l$       | Relative to the liquid               |
| $n$       | Relative to normal conditions        |
| $reac$    | Reactor related                      |
| $\varphi$ | Relative to a phase (liquid or gas)  |



### ***List of superscript***

|                      |                                    |
|----------------------|------------------------------------|
| <i>°</i>             | Relative to a standard value       |
| <i>CC</i>            | Concentration ratio                |
| <i>d<sub>b</sub></i> | Bubble diameter                    |
| <i>in</i>            | Relative to a reactor inlet value  |
| <i>out</i>           | Relative to a reactor outlet value |

### ***List of abbreviations***

|              |                                                        |
|--------------|--------------------------------------------------------|
| <i>ADM</i>   | Axial dispersion model                                 |
| <i>BCR</i>   | Bubble column reactor                                  |
| <i>BMP</i>   | Biological methane production                          |
| <i>CAD</i>   | Computer-assisted design                               |
| <i>CSTR</i>  | Continuous stirred-tank reactor                        |
| <i>DCW</i>   | Dried cell weight                                      |
| <i>DSMZ</i>  | Deutsche Sammlung von Mikroorganismen und Zellkulturen |
| <i>EnR</i>   | Renewable energy                                       |
| <i>FBR</i>   | Fixed bed reactor                                      |
| <i>FFKM</i>  | Perfluoroélastomères                                   |
| <i>HEPES</i> | Biochemical buffer                                     |
| <i>LOHC</i>  | Liquid organic hydrogen carriers                       |
| <i>MER</i>   | Methane evolution rate                                 |
| <i>MM</i>    | Minimum medium                                         |
| <i>MR</i>    | Membrane reactor                                       |
| <i>NDIR</i>  | Non-dispersive infrared sensor                         |
| <i>OD</i>    | Optical Density                                        |
| <i>ORP</i>   | Oxydo Reduction Potential                              |
| <i>RM</i>    | Rich medium                                            |

## References

- 1 B. W. K. Lewis and W. G. Whitman, *Ind. & Engineer. Chem.*, 1924, **16**, 1215-1220.
- 2 P. H. Calderbank and M. B. Moo-Young, *Chem. Eng. Sci.*, 1961, **16**, 39–54.
- 3 R. Maceiras, E. Álvarez and M. A. Cancela, *Chem. Eng. J.*, 2010, **163**, 331–336.
- 4 N. Kantarci, F. Borak and K. O. Ulgen, *Process Biochem.*, 2005, **40**, 2263–2283.
- 5 S. Degaleesan and M. P. Dudukovic, *AIChE J.*, 1998, **44**, 2369–2378.
